# Supplementary material
Source: MDPI journal article supplement (https://www.mdpi.com/1996-1073/14/6/1584)
Supplement: s1 [file s1]

**Table S1.** The maximum permissible values for HMs concentrations (mg/kg DM) according to the Regulation of the Minister of the Environment of February 6, 2015 on municipal sewage sludge (Poland) [21] and Directive 86/278/EEC [28].

| HM | Poland     |             |            | UE                    |
|----|------------|-------------|------------|-----------------------|
|    | Light soil | Medium soil | Heavy soil | 86/278/EEC<br>(range) |
| Cd | 3          | 4           | 5          | 1-3                   |
| Cr | 100        | 150         | 200        | -                     |
| Cu | 50         | 75          | 100        | 50-140                |
| Ni | 30         | 45          | 60         | 30-75                 |
| Pb | 50         | 75          | 100        | 50-300                |
| Zn | 150        | 220         | 300        | 150-300               |
| Hg | 1          | 1.5         | 2          | 1-1.5                 |
